# Supplementary material
Source: publisher site journal article supplement (http://kjim.org/upload/media/kjim-2019-171-suppl2.pdf)
Supplement: Supplementary file 1 [file kjim-2019-171-suppl2.pdf]

**Supplementary Table 2. Clinical characteristics of subjects with impaired fasting glucose according to BMI categories**

| Characteristic         | 23.0 ≤ BMI < 25.0 kg/m <sup>2</sup><br>(n = 604) | 25.0 ≤ BMI < 27.0 kg/m <sup>2</sup><br>(n = 487) | BMI < 27.0 kg/m <sup>2</sup><br>(n = 546) | p value |
|------------------------|--------------------------------------------------|--------------------------------------------------|-------------------------------------------|---------|
| Age, yr                | 55.8 ± 7.6                                       | 55.8 ± 7.5                                       | 53.4 ± 9.0                                | < 0.001 |
| Male sex               | 253 (41.9)                                       | 245 (50.3)                                       | 254 (46.5)                                | 0.020   |
| Height, cm             | 162.1 ± 8.6                                      | 163.3 ± 8.8                                      | 163.0 ± 9.0                               | 0.063   |
| Weight, kg             | 63.0 ± 6.9                                       | 69.2 ± 7.6                                       | 78.5 ± 10.2                               | < 0.001 |
| BMI, kg/m <sup>2</sup> | 23.9 ± 0.6                                       | 25.9 ± 0.6                                       | 29.5 ± 2.3                                | < 0.001 |
| WC, cm                 | 84.9 ± 5.8                                       | 90.0 ± 5.0                                       | 97.2 ± 7.4                                | < 0.001 |
| SBP, mmHg              | 121.9 ± 12.7                                     | 125.0 ± 13.1                                     | 128.1 ± 12.5                              | < 0.001 |
| DBP, mmHg              | 78.3 ± 9.5                                       | 81.1 ± 8.6                                       | 83.0 ± 9.1                                | < 0.001 |
| FPG, mg/dL             | 102.1 ± 13.3                                     | 104.4 ± 13.3                                     | 106.1 ± 15.5                              | < 0.001 |
| 2hr PG, mg/dL          | 156.6 ± 52.7                                     | 165.2 ± 58.6                                     | 168.2 ± 54.5                              | 0.001   |
| HbA1c, %               | 5.8 ± 0.5                                        | 5.9 ± 0.4                                        | 5.9 ± 0.5                                 | 0.034   |
| TC, mg/dL              | 190.8 ± 35.4                                     | 189.0 ± 35.0                                     | 192.0 ± 36.6                              | 0.415   |
| TG, mg/dL              | 133.9 ± 89.7                                     | 152.5 ± 92.7                                     | 162.2 ± 93.4                              | < 0.001 |
| HDL-C, mg/dL           | 53.4 ± 14.2                                      | 51.5 ± 13.4                                      | 49.7 ± 12.1                               | < 0.001 |
| LDL-C, mg/dL           | 118.6 ± 33.6                                     | 116.0 ± 33.5                                     | 118.7 ± 34.1                              | 0.368   |
| Alcohol drinker        | 318 (52.7)                                       | 284 (58.3)                                       | 328 (60.1)                                | 0.025   |
| Current smoker         | 59 (9.8)                                         | 67 (13.8)                                        | 72 (13.2)                                 | 0.025   |
| F/Hx of DM             | 256 (42.7)                                       | 211 (43.6)                                       | 256 (47.2)                                | 0.279   |
| Hypertension           | 135 (22.4)                                       | 146 (30.0)                                       | 200 (36.6)                                | < 0.001 |
| FPG levels, mg/dL      |                                                  |                                                  |                                           |         |
| < 100                  | 286 (47.3)                                       | 187 (38.4)                                       | 191 (35.0)                                | 0.001   |
| 100–109                | 181 (30.0)                                       | 154 (31.6)                                       | 180 (33.0)                                |         |
| 110–125                | 106 (17.6)                                       | 114 (23.4)                                       | 132 (24.2)                                |         |
| ≥ 126                  | 31 (5.1)                                         | 32 (6.6)                                         | 43 (7.8)                                  |         |
| 2hr PG ≥ 200 mg/dL     | 112 (18.5)                                       | 141 (29.0)                                       | 143 (26.2)                                | 0.001   |
| HbA1c ≥ 6.5%           | 43 (7.1)                                         | 35 (7.2)                                         | 50 (9.2)                                  | 0.024   |

Values are presented as mean ± SD or number (%).

BMI, body mass index; WC, waist circumference; SBP, systolic blood pressure; DBP, diastolic blood pressure; FPG, fasting plasma glucose; 2hr PG, 2-hour postchallenge glucose; HbA1c, hemoglobin A1c; TC, total cholesterol; TG, triglyceride; HDL-C, high density lipoprotein cholesterol; LDL-C, low density lipoprotein cholesterol; F/Hx, family history; DM, diabetes mellitus; FPG, fasting plasma glucose.
